# Supplementary material for: Brigatinib, an anaplastic lymphoma kinase inhibitor, abrogates activity and growth in ALK-positive neuroblastoma cells, Drosophila and mice
Source: PubMed Central journal article supplement (PMC5045374; doi:10.18632/oncotarget.8508), 2016-03-31
Supplement: oncotarget-07-29011-s001.pdf [file oncotarget-07-29011-s001.pdf]

## Brigatinib, an anaplastic lymphoma kinase inhibitor, abrogates activity and growth in ALK-positive neuroblastoma cells, *Drosophila* and mice

### SUPPLEMENTARY FIGURES

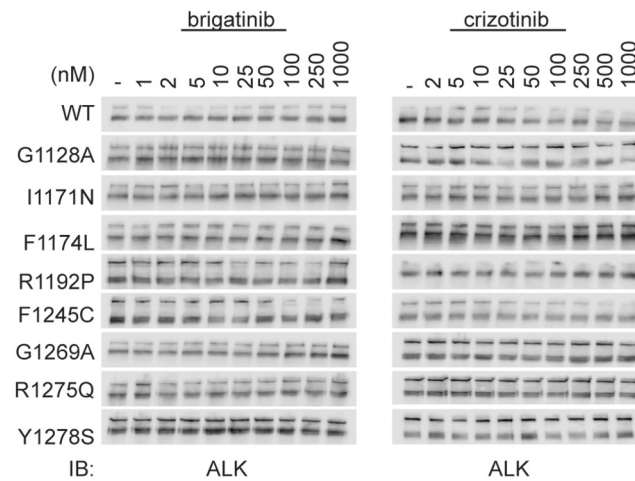

Supplementary Figure S1: Western blot analysis of ALK expression, in PC12 cell line, for all the indicated mutant ALK alleles, treated with either brigatinib or crizotinib.

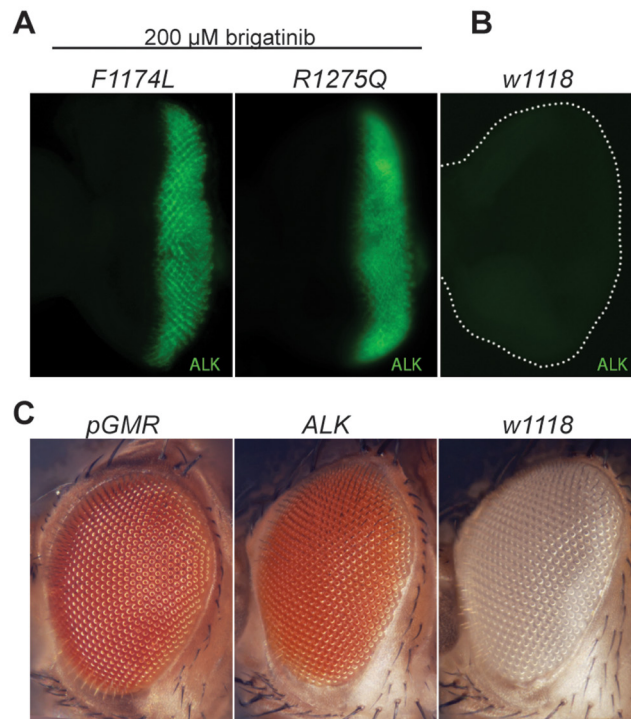

**Supplementary Figure S2: Ectopic expression of human ALK mutations in *Drosophila* eye.** A. Eyes discs of either ectopically expressed gain-of-function mutations ALK-F1174L or ALK-R1275Q in *Drosophila* developed and grown in 200  $\mu\text{M}$  brigatinib. B. Control stain of w1118 *Drosophila* eye. C. Eye of pGMR-GAL4 driver fly strain, followed by ectopic expression of wild-type human ALK in the adult eye which does not disrupt the wildtype organized pattern of ommatidia, indicating that the receptor is inactive. Finally, w1118, wild-type *Drosophila* eye displaying a highly organized pattern of ommatidia.
